# Supplementary figures and images for: Common Transcriptional Program of Liver Fibrosis in Mouse Genetic Models and Humans
Source: MDPI journal article supplement (doi:10.3390/ijms22020832), 2021-01-15

A heat map of 62 common DEGs

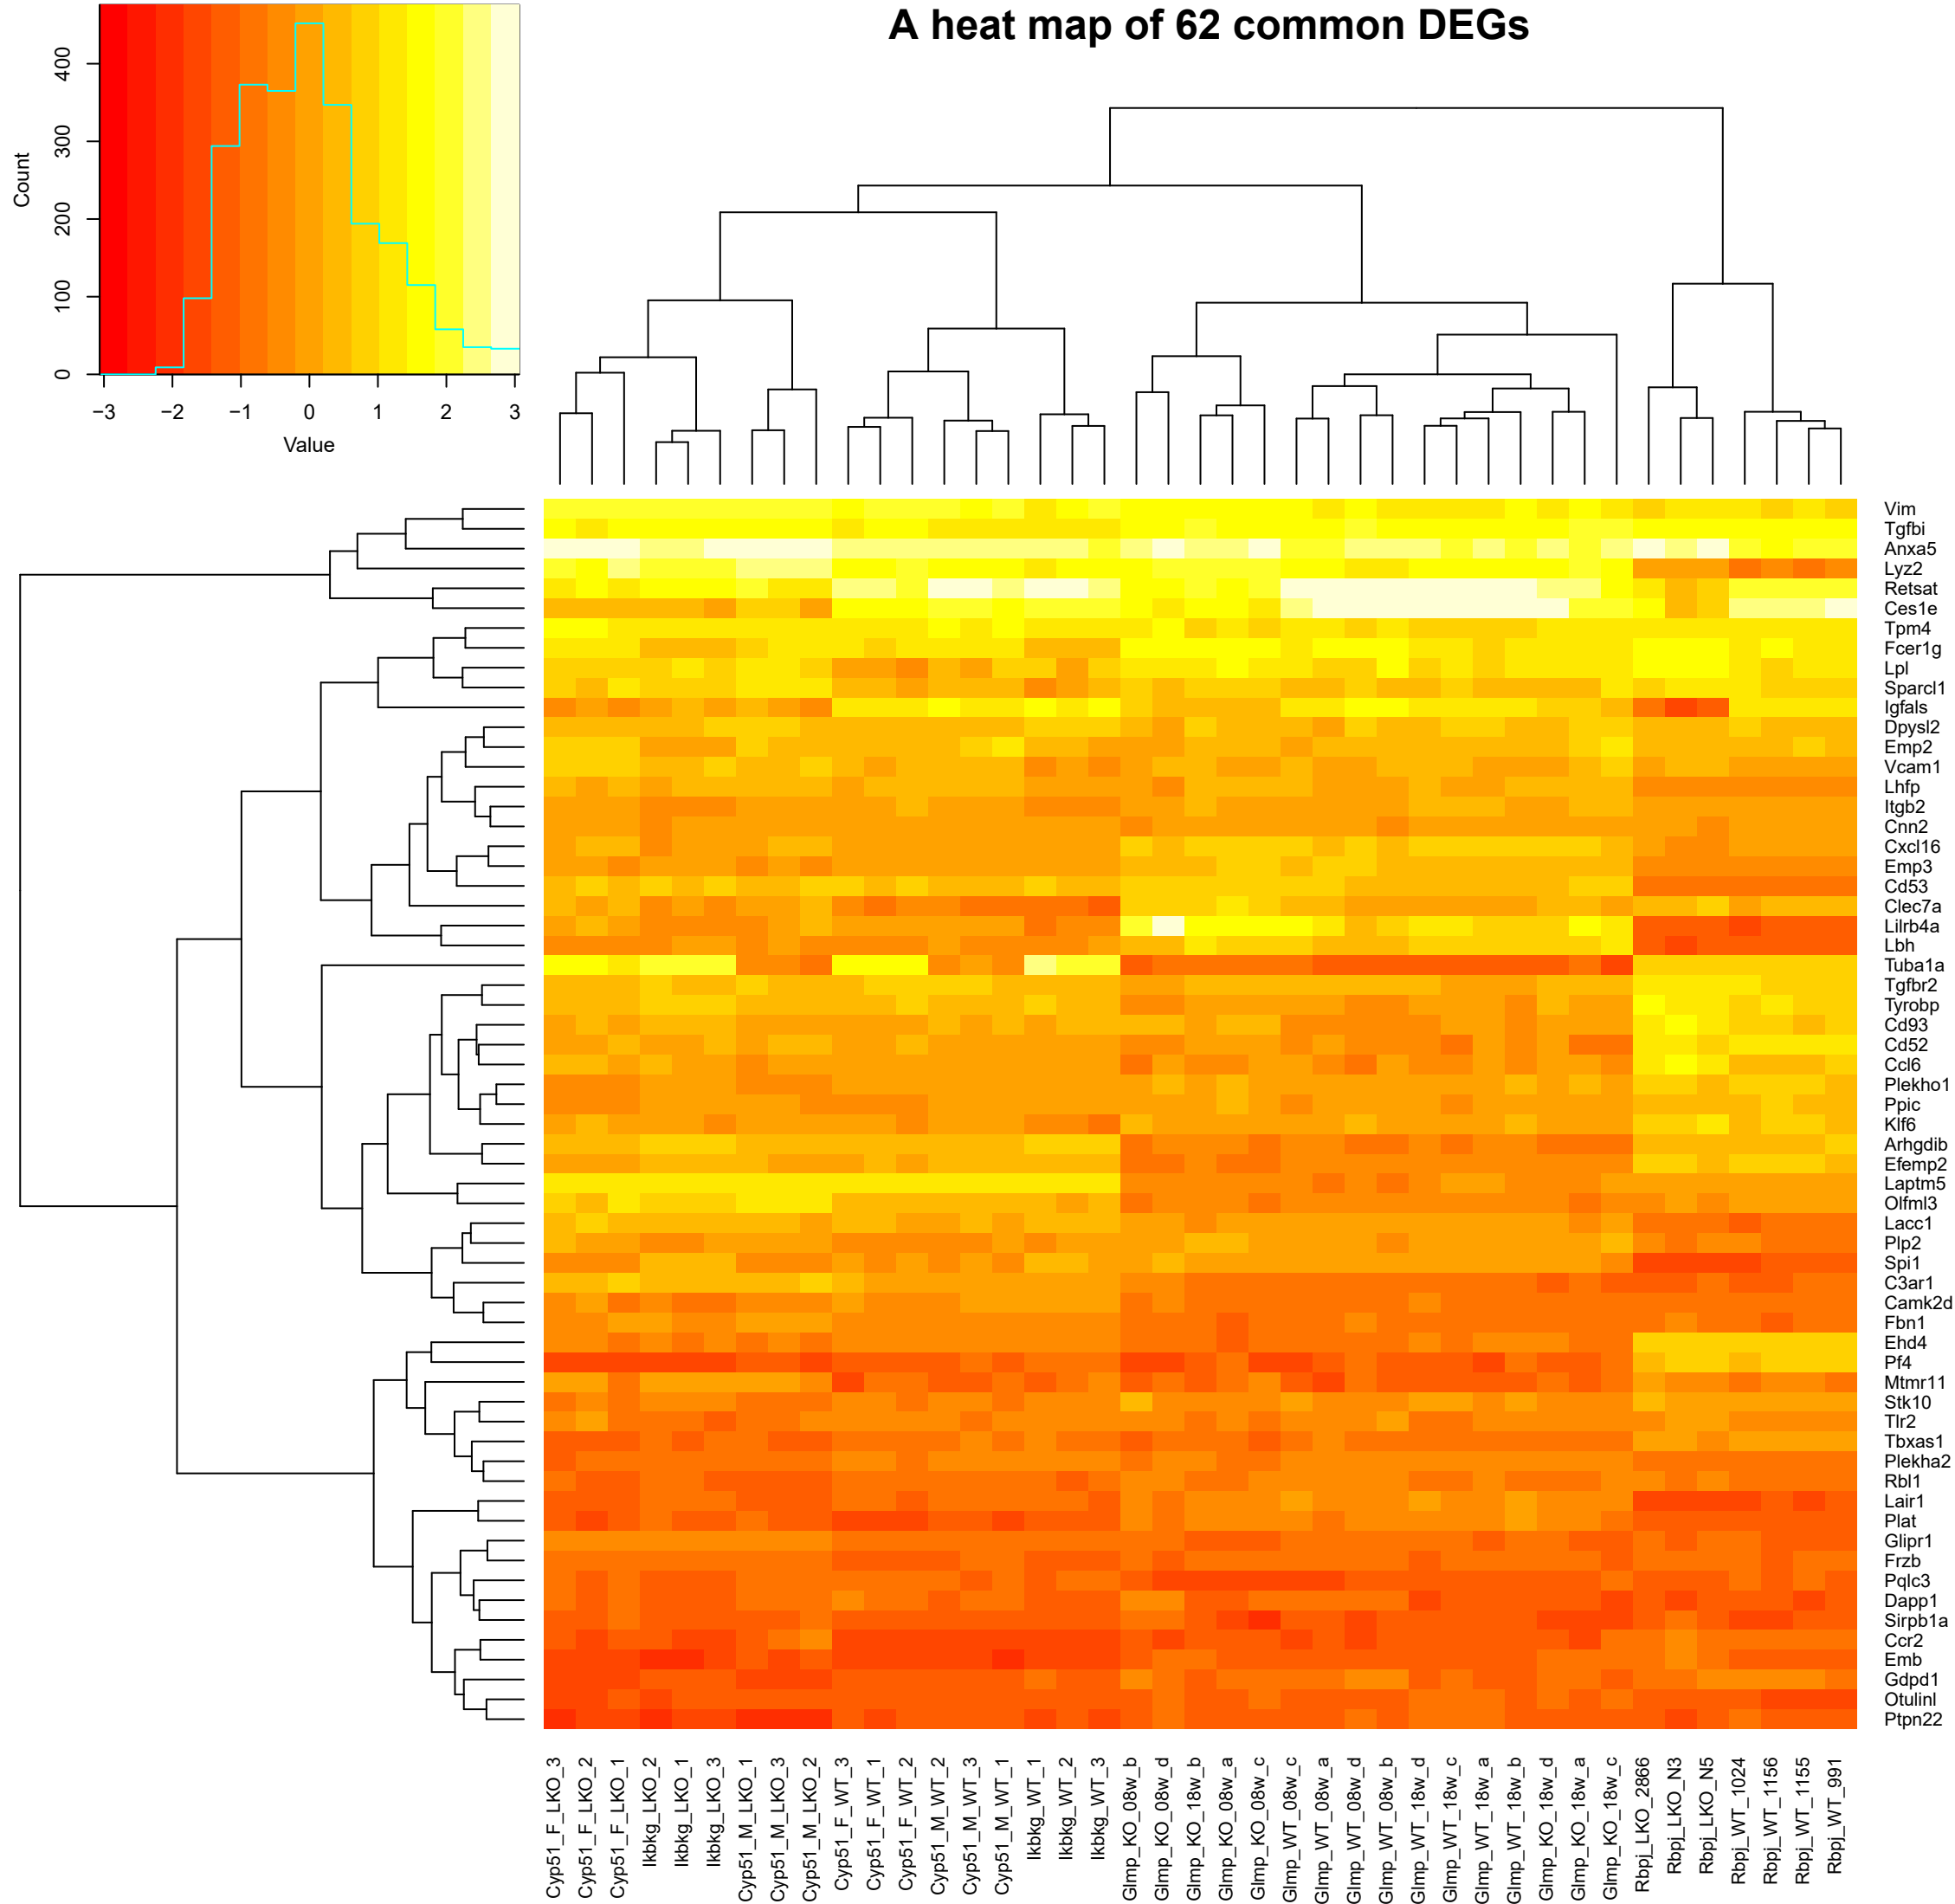

Supplement: s1 [file s1]
